# Supplementary material
Source: publisher figshare collection journal article supplement (https://acs.figshare.com/ndownloader/files/5077039)
Supplement: Supplementary file 1 [file 5077039]

REMARK   4                                                                      
REMARK   4 CDCL COMPLIES WITH FORMAT V. 2.0, 30-JUN-2005                        
ATOM      1  C1  MOLE    1      -1.906  -3.714   0.301  1.00  0.00           C  
ATOM      2  O2  MOLE    1      -1.619  -4.227   1.385  1.00  0.00           O  
ATOM      3  C2  MOLE    1      -0.851  -3.322  -0.764  1.00  0.00           C  
ATOM      4  C14 MOLE    1       0.057  -4.520  -1.185  1.00  0.00           C  
ATOM      5  C3  MOLE    1      -0.122  -1.984  -0.364  1.00  0.00           C  
ATOM      6  O3  MOLE    1       1.177  -2.251   0.247  1.00  0.00           O  
ATOM      7  C21 MOLE    1       1.274  -2.154   1.682  1.00  0.00           C  
ATOM      8  O8  MOLE    1       1.314  -0.744   2.055  1.00  0.00           O  
ATOM      9  C25 MOLE    1       1.492  -0.409   3.463  1.00  0.00           C  
ATOM     10  C4  MOLE    1       0.048  -0.933  -1.518  1.00  0.00           C  
ATOM     11  C15 MOLE    1       0.925  -1.503  -2.669  1.00  0.00           C  
ATOM     12  C5  MOLE    1       0.570   0.472  -1.030  1.00  0.00           C  
ATOM     13  O4  MOLE    1       0.804   1.331  -2.190  1.00  0.00           O  
ATOM     14  C28 MOLE    1       2.168   1.705  -2.495  1.00  0.00           C  
ATOM     15  O11 MOLE    1       2.647   2.619  -1.466  1.00  0.00           O  
ATOM     16  C32 MOLE    1       3.968   3.182  -1.638  1.00  0.00           C  
ATOM     17  C33 MOLE    1       4.220   4.104  -0.443  1.00  0.00           C  
ATOM     18  C6  MOLE    1      -0.350   1.266  -0.027  1.00  0.00           C  
ATOM     19  C16 MOLE    1       0.454   2.337   0.745  1.00  0.00           C  
ATOM     20  C7  MOLE    1      -1.603   1.914  -0.694  1.00  0.00           C  
ATOM     21  C8  MOLE    1      -2.645   2.575   0.248  1.00  0.00           C  
ATOM     22  O5  MOLE    1      -2.371   3.979   0.493  1.00  0.00           O  
ATOM     23  C17 MOLE    1      -3.498   3.657  -0.354  1.00  0.00           C  
ATOM     24  C9  MOLE    1      -3.281   1.759   1.400  1.00  0.00           C  
ATOM     25  O6  MOLE    1      -2.802   1.811   2.539  1.00  0.00           O  
ATOM     26  C10 MOLE    1      -4.456   0.784   1.125  1.00  0.00           C  
ATOM     27  C18 MOLE    1      -5.680   1.066   2.034  1.00  0.00           C  
ATOM     28  C11 MOLE    1      -3.949  -0.692   1.172  1.00  0.00           C  
ATOM     29  O7  MOLE    1      -3.518  -0.957   2.509  1.00  0.00           O  
ATOM     30  C12 MOLE    1      -4.924  -1.822   0.704  1.00  0.00           C  
ATOM     31  C19 MOLE    1      -5.449  -1.566  -0.738  1.00  0.00           C  
ATOM     32  C13 MOLE    1      -4.263  -3.234   0.854  1.00  0.00           C  
ATOM     33  C20 MOLE    1      -5.231  -4.415   0.658  1.00  0.00           C  
ATOM     34  O1  MOLE    1      -3.185  -3.360  -0.112  1.00  0.00           O  
ATOM     35  O12 MOLE    1       1.884   1.484  -4.927  1.00  0.00           O  
ATOM     36  C29 MOLE    1       2.188   2.405  -3.877  1.00  0.00           C  
ATOM     37  C35 MOLE    1       2.762   4.959  -5.694  1.00  0.00           C  
ATOM     38  C34 MOLE    1       4.960   3.833  -6.138  1.00  0.00           C  
ATOM     39  N1  MOLE    1       3.612   3.740  -5.507  1.00  0.00           N  
ATOM     40  C30 MOLE    1       3.575   3.051  -4.162  1.00  0.00           C  
ATOM     41  C31 MOLE    1       4.028   3.952  -2.978  1.00  0.00           C  
ATOM     42  C22 MOLE    1       2.579  -2.840   2.125  1.00  0.00           C  
ATOM     43  C26 MOLE    1       2.303  -4.734   4.819  1.00  0.00           C  
ATOM     44  O9  MOLE    1       1.878  -3.419   4.397  1.00  0.00           O  
ATOM     45  C23 MOLE    1       2.839  -2.640   3.640  1.00  0.00           C  
ATOM     46  C24 MOLE    1       2.733  -1.144   4.053  1.00  0.00           C  
ATOM     47  O10 MOLE    1       3.897  -0.468   3.581  1.00  0.00           O  
ATOM     48  C27 MOLE    1       0.175  -0.618   4.228  1.00  0.00           C  
ATOM     49  H2  MOLE    1      -1.446  -3.089  -1.667  1.00  0.00           H  
ATOM     50 1H14 MOLE    1      -0.180  -5.458  -0.646  1.00  0.00           H  
ATOM     51 2H14 MOLE    1      -0.038  -4.745  -2.263  1.00  0.00           H  
ATOM     52 3H14 MOLE    1       1.131  -4.330  -1.004  1.00  0.00           H  
ATOM     53  H3  MOLE    1      -0.769  -1.477   0.377  1.00  0.00           H  
ATOM     54  H21 MOLE    1       0.411  -2.658   2.164  1.00  0.00           H  
ATOM     55  H25 MOLE    1       1.700   0.679   3.514  1.00  0.00           H  
ATOM     56  H4  MOLE    1      -0.953  -0.754  -1.952  1.00  0.00           H  
ATOM     57 3H15 MOLE    1       0.516  -2.440  -3.087  1.00  0.00           H  
ATOM     58 2H15 MOLE    1       1.955  -1.720  -2.328  1.00  0.00           H  
ATOM     59 1H15 MOLE    1       1.001  -0.801  -3.520  1.00  0.00           H  
ATOM     60  H5  MOLE    1       1.527   0.268  -0.505  1.00  0.00           H  
ATOM     61  H28 MOLE    1       2.809   0.802  -2.529  1.00  0.00           H  
ATOM     62  H32 MOLE    1       4.720   2.366  -1.630  1.00  0.00           H  
ATOM     63 3H33 MOLE    1       4.124   3.549   0.508  1.00  0.00           H  
ATOM     64 2H33 MOLE    1       3.483   4.928  -0.406  1.00  0.00           H  
ATOM     65 1H33 MOLE    1       5.229   4.552  -0.467  1.00  0.00           H  
ATOM     66  H6  MOLE    1      -0.696   0.565   0.752  1.00  0.00           H  
ATOM     67 3H16 MOLE    1       0.757   3.177   0.093  1.00  0.00           H  
ATOM     68 2H16 MOLE    1       1.377   1.921   1.191  1.00  0.00           H  
ATOM     69 1H16 MOLE    1      -0.129   2.771   1.578  1.00  0.00           H  
ATOM     70 2H7  MOLE    1      -1.251   2.658  -1.435  1.00  0.00           H  
ATOM     71 1H7  MOLE    1      -2.127   1.153  -1.299  1.00  0.00           H  
ATOM     72 2H17 MOLE    1      -3.318   3.993  -1.392  1.00  0.00           H  
ATOM     73 1H17 MOLE    1      -4.446   3.960   0.129  1.00  0.00           H  
ATOM     74  H10 MOLE    1      -4.779   0.990   0.089  1.00  0.00           H  
ATOM     75 2H18 MOLE    1      -5.461   0.857   3.098  1.00  0.00           H  
ATOM     76 1H18 MOLE    1      -6.551   0.444   1.756  1.00  0.00           H  
ATOM     77 3H18 MOLE    1      -6.010   2.121   1.974  1.00  0.00           H  
ATOM     78  H7  MOLE    1      -3.165  -0.124   2.847  1.00  0.00           H  
ATOM     79  H11 MOLE    1      -3.057  -0.759   0.514  1.00  0.00           H  
ATOM     80  H12 MOLE    1      -5.793  -1.802   1.389  1.00  0.00           H  
ATOM     81 1H19 MOLE    1      -6.028  -0.628  -0.815  1.00  0.00           H  
ATOM     82 3H19 MOLE    1      -6.129  -2.366  -1.082  1.00  0.00           H  
ATOM     83 2H19 MOLE    1      -4.624  -1.507  -1.473  1.00  0.00           H  
ATOM     84  H13 MOLE    1      -3.885  -3.316   1.896  1.00  0.00           H  
ATOM     85 3H20 MOLE    1      -6.117  -4.332   1.313  1.00  0.00           H  
ATOM     86 2H20 MOLE    1      -4.734  -5.372   0.897  1.00  0.00           H  
ATOM     87 1H20 MOLE    1      -5.588  -4.490  -0.385  1.00  0.00           H  
ATOM     88 HO12 MOLE    1       2.209   1.933  -5.718  1.00  0.00           H  
ATOM     89  H29 MOLE    1       1.414   3.195  -3.850  1.00  0.00           H  
ATOM     90 1H35 MOLE    1       3.062   5.783  -5.020  1.00  0.00           H  
ATOM     91 2H35 MOLE    1       1.693   4.745  -5.504  1.00  0.00           H  
ATOM     92 3H35 MOLE    1       2.818   5.346  -6.730  1.00  0.00           H  
ATOM     93 2H34 MOLE    1       4.912   4.270  -7.154  1.00  0.00           H  
ATOM     94 1H34 MOLE    1       5.653   4.456  -5.541  1.00  0.00           H  
ATOM     95 3H34 MOLE    1       5.421   2.833  -6.251  1.00  0.00           H  
ATOM     96  H30 MOLE    1       4.288   2.201  -4.203  1.00  0.00           H  
ATOM     97 2H31 MOLE    1       5.046   4.340  -3.155  1.00  0.00           H  
ATOM     98 1H31 MOLE    1       3.368   4.837  -2.917  1.00  0.00           H  
ATOM     99 2H22 MOLE    1       2.537  -3.914   1.875  1.00  0.00           H  
ATOM    100 1H22 MOLE    1       3.418  -2.424   1.540  1.00  0.00           H  
ATOM    101 1H26 MOLE    1       2.759  -5.312   3.992  1.00  0.00           H  
ATOM    102 3H26 MOLE    1       1.438  -5.316   5.186  1.00  0.00           H  
ATOM    103 2H26 MOLE    1       3.036  -4.672   5.645  1.00  0.00           H  
ATOM    104  H23 MOLE    1       3.870  -2.975   3.876  1.00  0.00           H  
ATOM    105  H24 MOLE    1       2.719  -1.077   5.158  1.00  0.00           H  
ATOM    106 HO10 MOLE    1       3.759  -0.367   2.634  1.00  0.00           H  
ATOM    107 3H27 MOLE    1      -0.120  -1.682   4.263  1.00  0.00           H  
ATOM    108 2H27 MOLE    1      -0.650  -0.062   3.745  1.00  0.00           H  
ATOM    109 1H27 MOLE    1       0.249  -0.260   5.270  1.00  0.00           H  
END
